# Supplementary material for: Generation and Characterization of a New Preclinical Mouse Model of EGFR-Driven Lung Cancer with MET-Induced Osimertinib Resistance
Source: MDPI journal article supplement (doi:10.3390/cancers13143441), 2021-07-09

Figure 1C

| EGFR |   |   |   | EGFR/MET |   |   |   |
|------|---|---|---|----------|---|---|---|
| 1    | 2 | 3 | 4 | 5        | 6 | 7 | 8 |

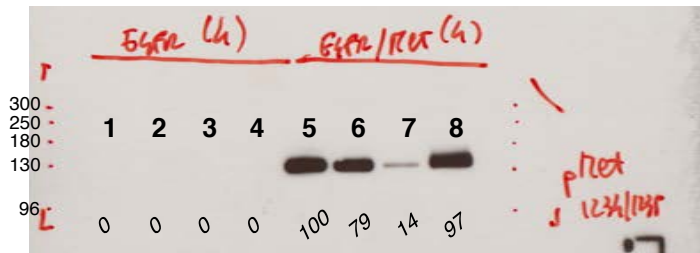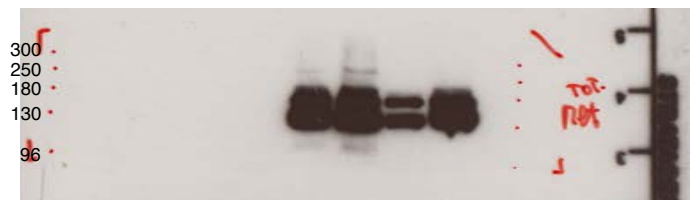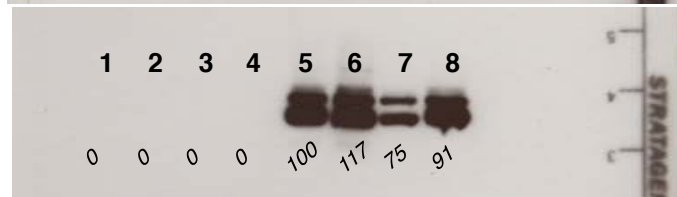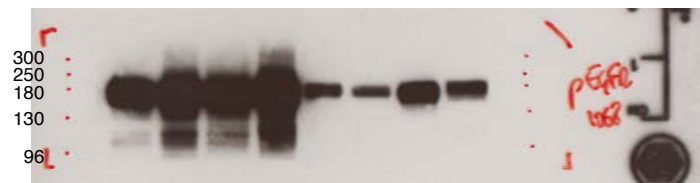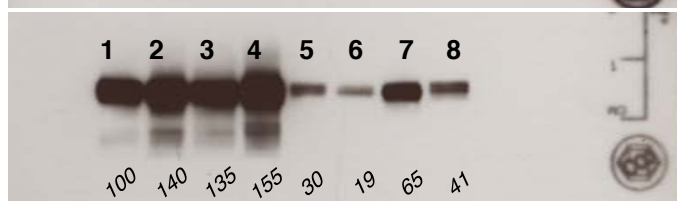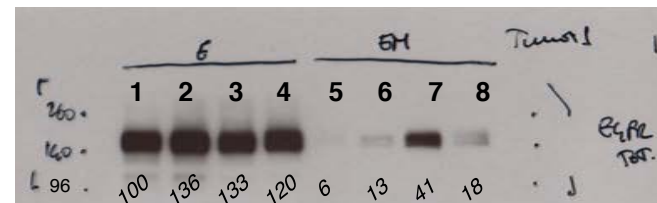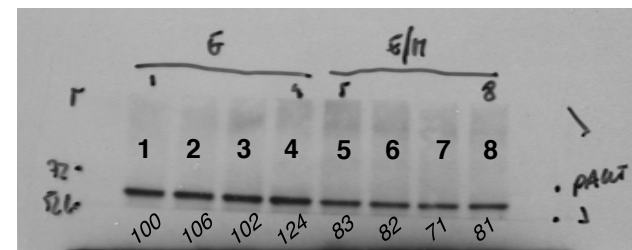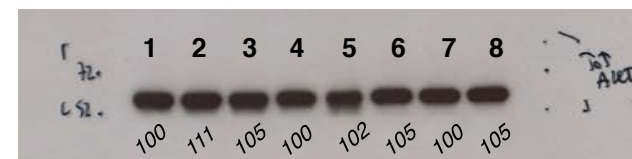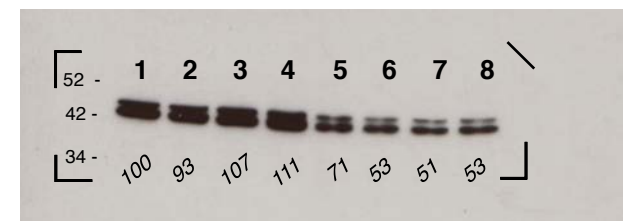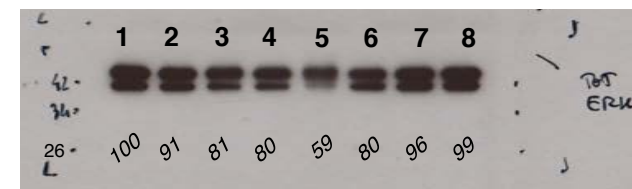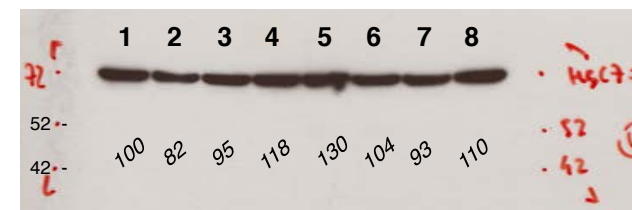

Figure 2B

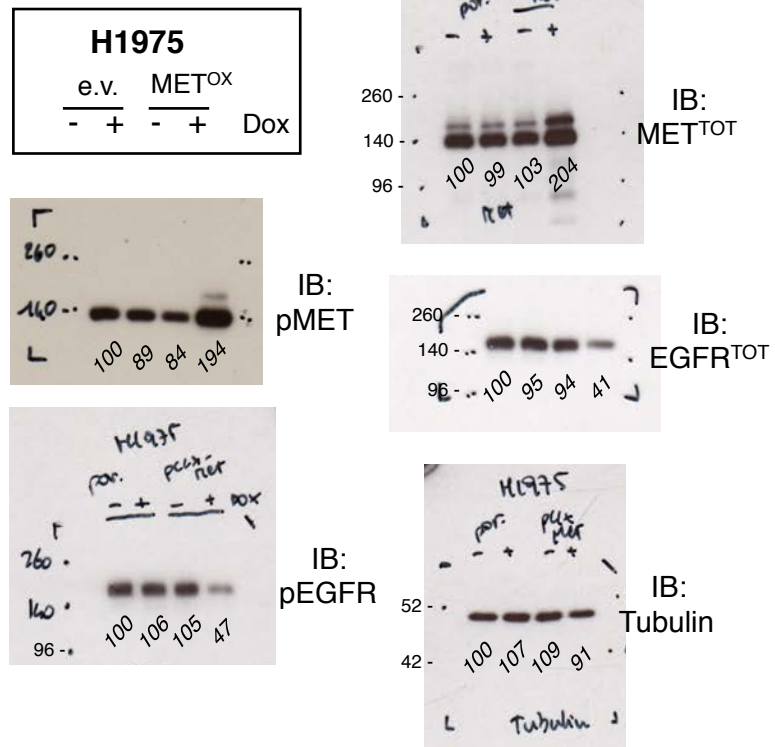

Supplemental Fig2A

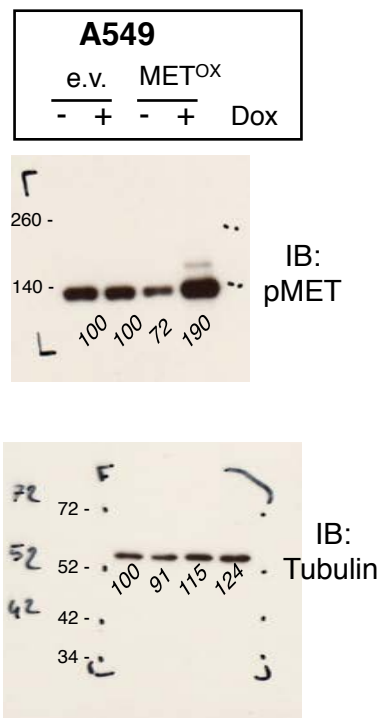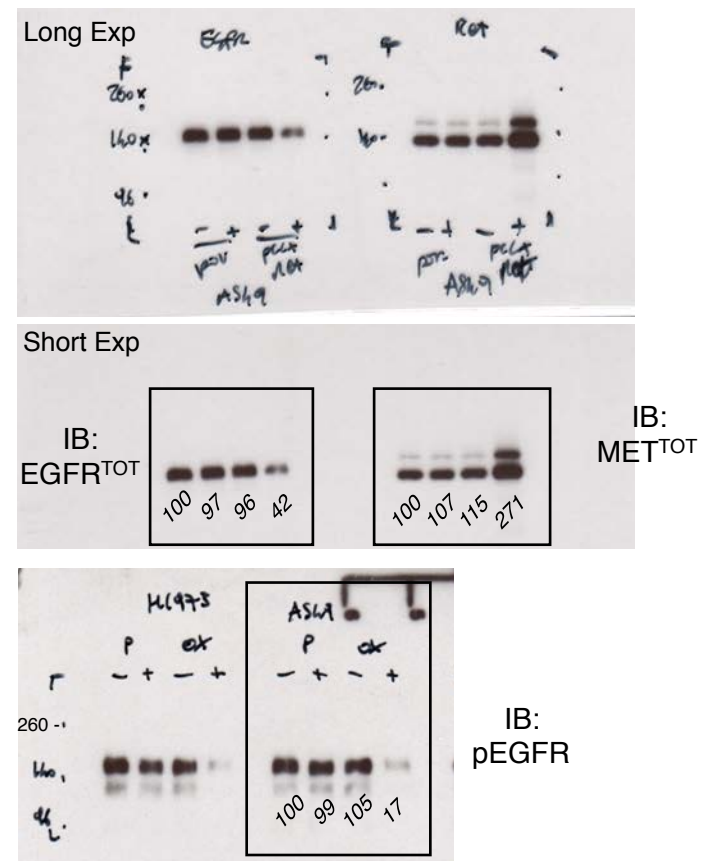

Figure 3C

| EGFR    |   |   |     |   |   | EGFR/MET |   |   |     |    |    |
|---------|---|---|-----|---|---|----------|---|---|-----|----|----|
| vehicle |   |   | Osi |   |   | vehicle  |   |   | Osi |    |    |
| 1       | 2 | 3 | 4   | 5 | 6 | 7        | 8 | 9 | 10  | 11 | 12 |

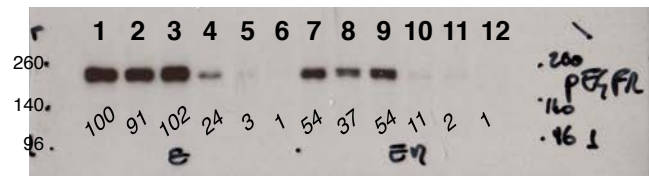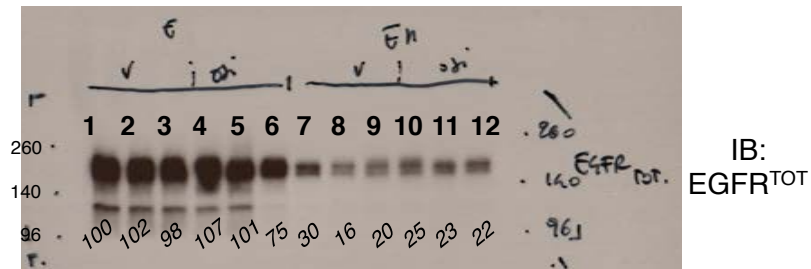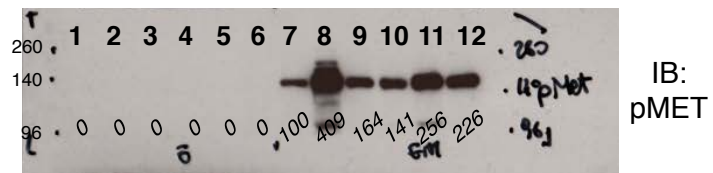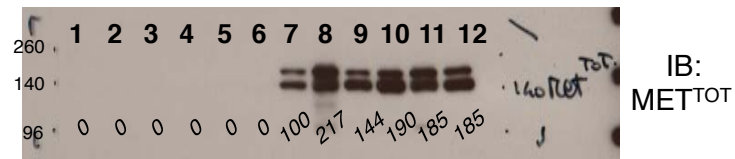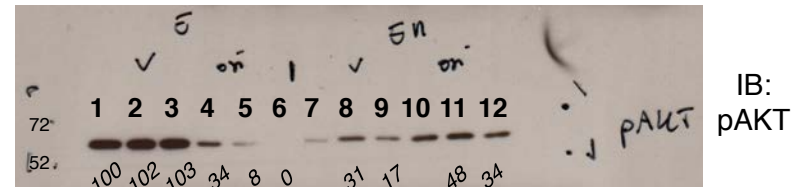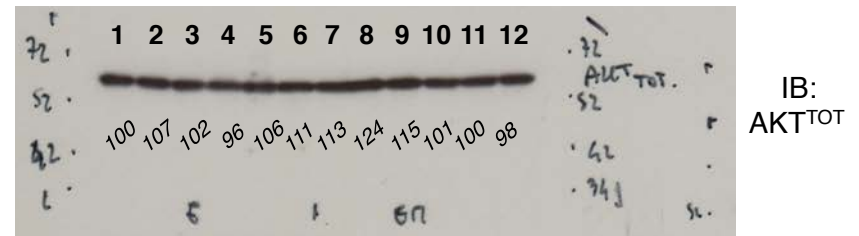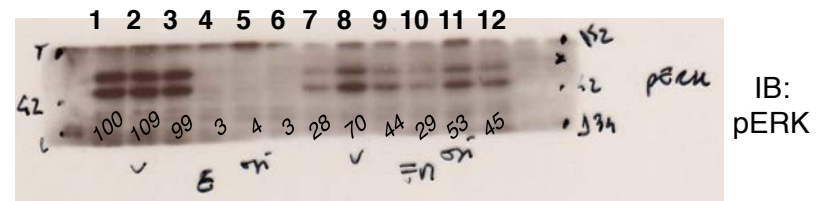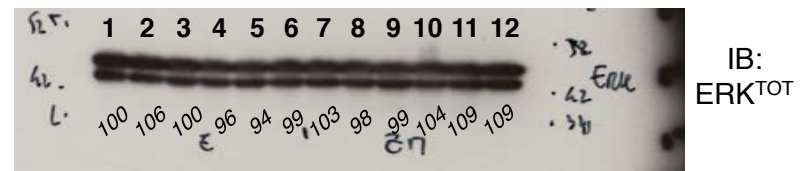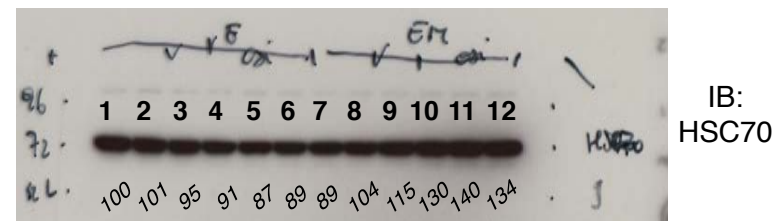

Figure 4D

| EGFR/MET |   |   |       |   |   |     |   |   |           |    |    |
|----------|---|---|-------|---|---|-----|---|---|-----------|----|----|
| vehicle  |   |   | Crizo |   |   | Osi |   |   | Crizo+Osi |    |    |
| 1        | 2 | 3 | 4     | 5 | 6 | 7   | 8 | 9 | 10        | 11 | 12 |

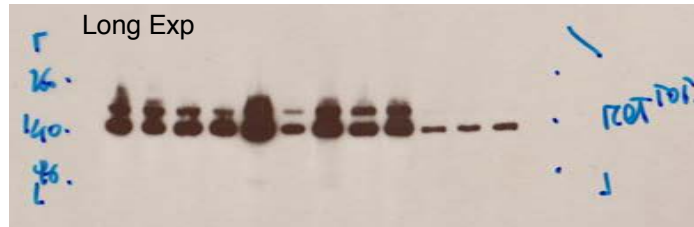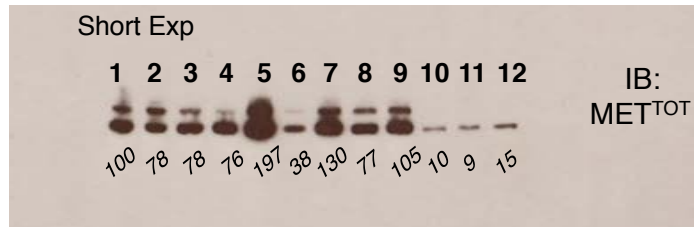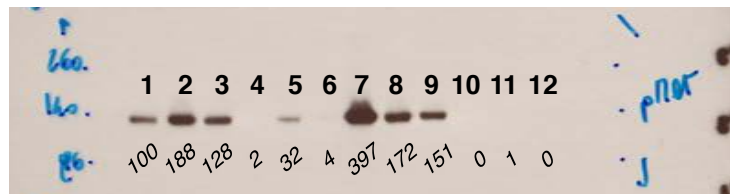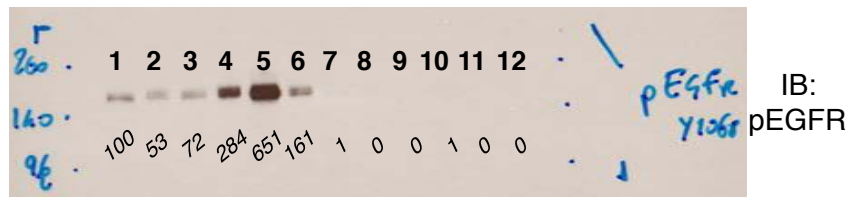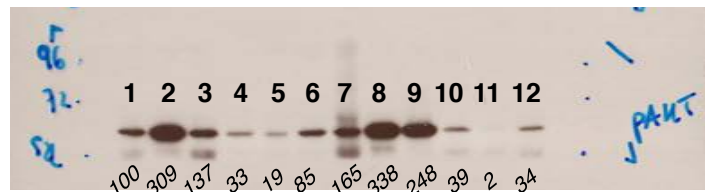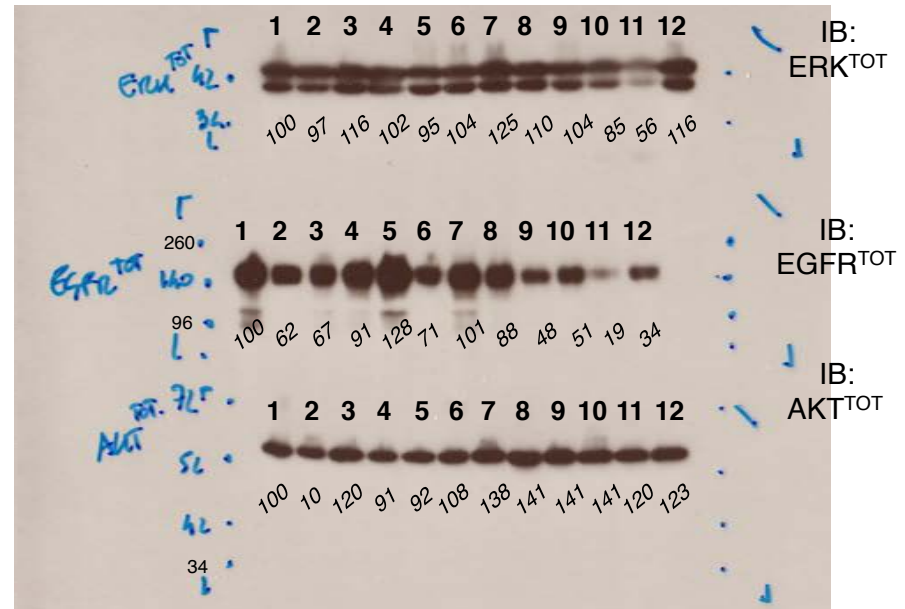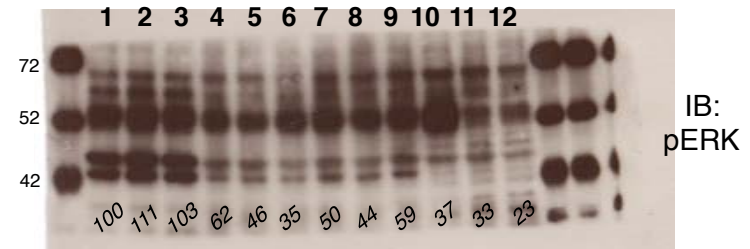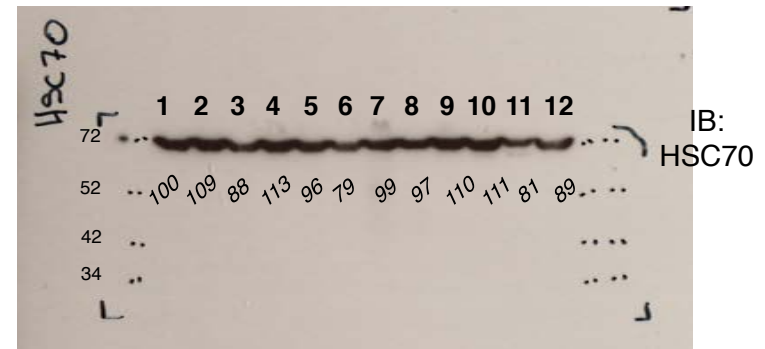

Supplement: s1 [file s1]
