# Supplementary material for: Generation and Characterization of a New Preclinical Mouse Model of EGFR-Driven Lung Cancer with MET-Induced Osimertinib Resistance
Source: MDPI journal article supplement (doi:10.3390/cancers13143441), 2021-07-09
Supplement: s1 [file s1]

# Generation and Characterization of a New Preclinical Mouse Model of EGFR-Driven Lung Cancer with MET-Induced Osimertinib Resistance

Maicol Mancini, Quentin-Dominique Thomas, Sylvia Bourdel, Laura Papon <sup>1</sup>, Emilie Bousquet, Prisca Jalta, Silvia La Monica, Camille Travert, Roberta Alfieri, Xavier Quantin, Marta Cañamero and Antonio Maraver

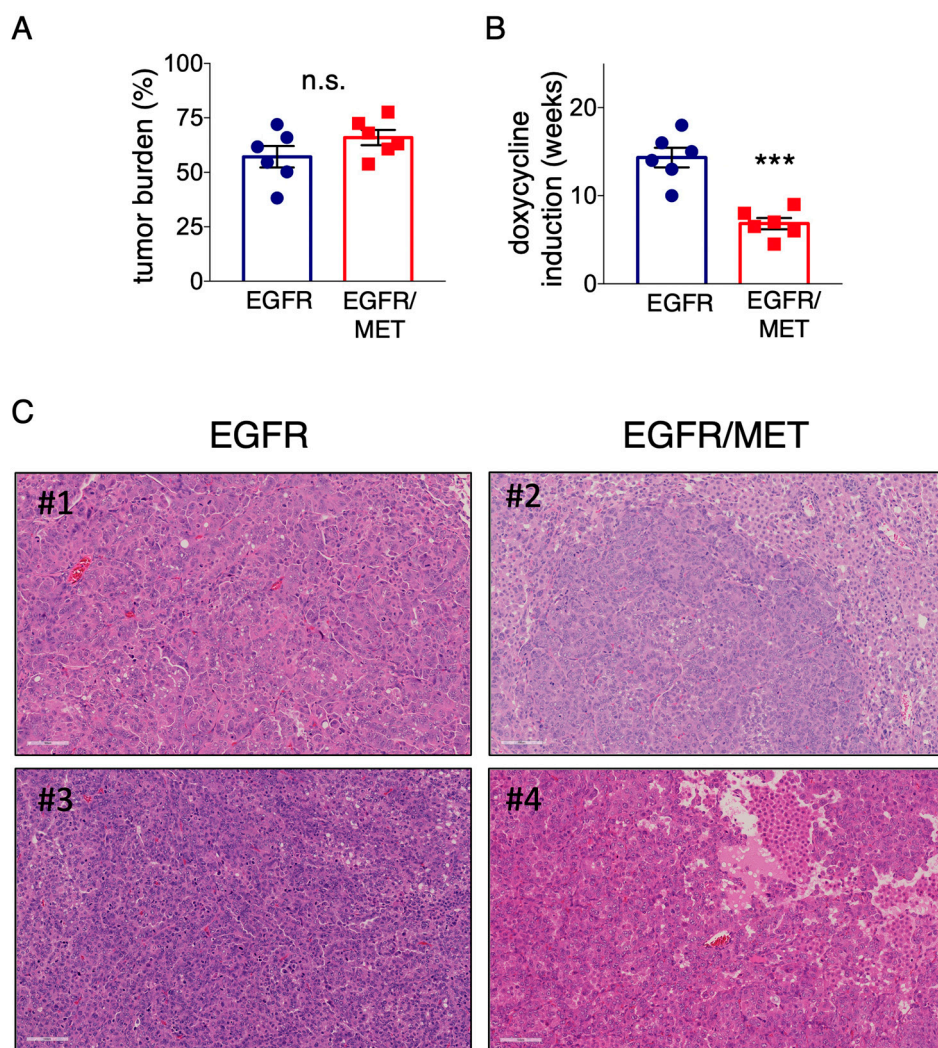

**Figure S1.** (A) Tumor burden in hematoxylin & eosin-stained lung samples from EGFR ( $n = 6$ ) and EGFR/MET ( $n = 6$ ) mice (see Figure 1C). Data are the mean  $\pm$  SEM; n.s., not significant (unpaired  $t$ -test). (B) Survival time after MET and EGFR transgene induction with doxycycline (same mice as in A). Data are the mean  $\pm$  SEM; \*\*\*  $p \leq 0.001$  (unpaired  $t$ -test). (C) Four examples of adenocarcinoma in EGFR (mice 1 and 3) and EGFR/MET (mice 2 and 4) mice. All were solid adenocarcinomas with high proliferation rate, as indicated by the several metaphase mitotic figures in metaphase. In mouse 2, the tumor was surrounded by a dense infiltrate with macrophages and plasma cells. In mouse 4, the presence of edema with macrophages could be observed. Scale bar, 100  $\mu$ m.

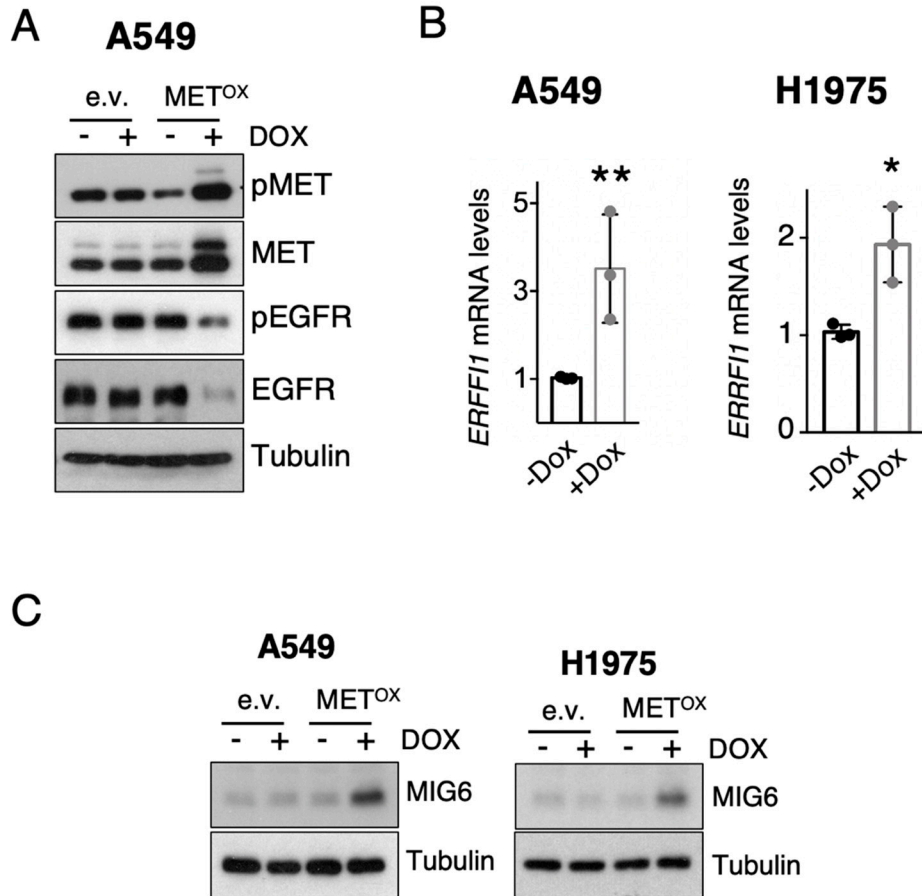

**Figure S2.** (A) Immunoblotting of the indicated proteins in A549 cells infected with lentiviral particles harboring the doxycycline-inducible MET construct (MET<sup>OX</sup>) or empty vector (e.v.). Cells were incubated (+) or not (-) with 1  $\mu$ g/mL of doxycycline for 48 h. This is a representative example of an experiment performed twice. (B) *ERRFI1* mRNA levels in A549 and H1975 cells infected with lentiviral particles harboring the doxycycline-inducible MET construct (MET<sup>OX</sup>,  $n = 3$ ). Cells were treated or not with 1  $\mu$ g/mL of doxycycline for 48 h. Values are the mean  $\pm$  SD; \*  $p \leq 0.05$ , \*\*  $p \leq 0.01$  (unpaired  $t$ -test). (C) Immunoblotting of the indicated proteins in A549 and H1975 cells treated as in A. This is a representative example of an experiment performed three times.

A

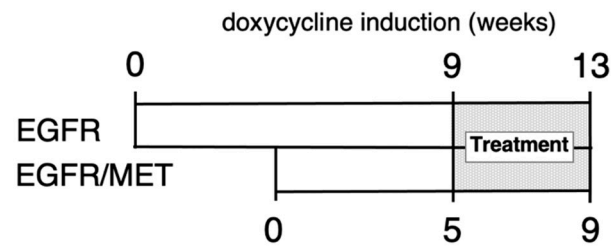

B

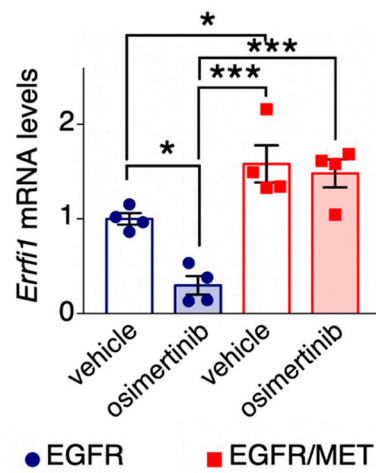

**Figure S3.** (A) The cartoon depicts the experimental setting of Figure 3. (B) *Errfi1* mRNA expression levels in lung tumors from EGFR and EGFR/MET mice treated with vehicle or osimertinib ( $n = 4$  tumors/group). Values are the mean  $\pm$  SEM; \* $p \leq 0.05$ , \*\*\* $p \leq 0.001$  (one-way ANOVA followed by the Tukey post-hoc test).

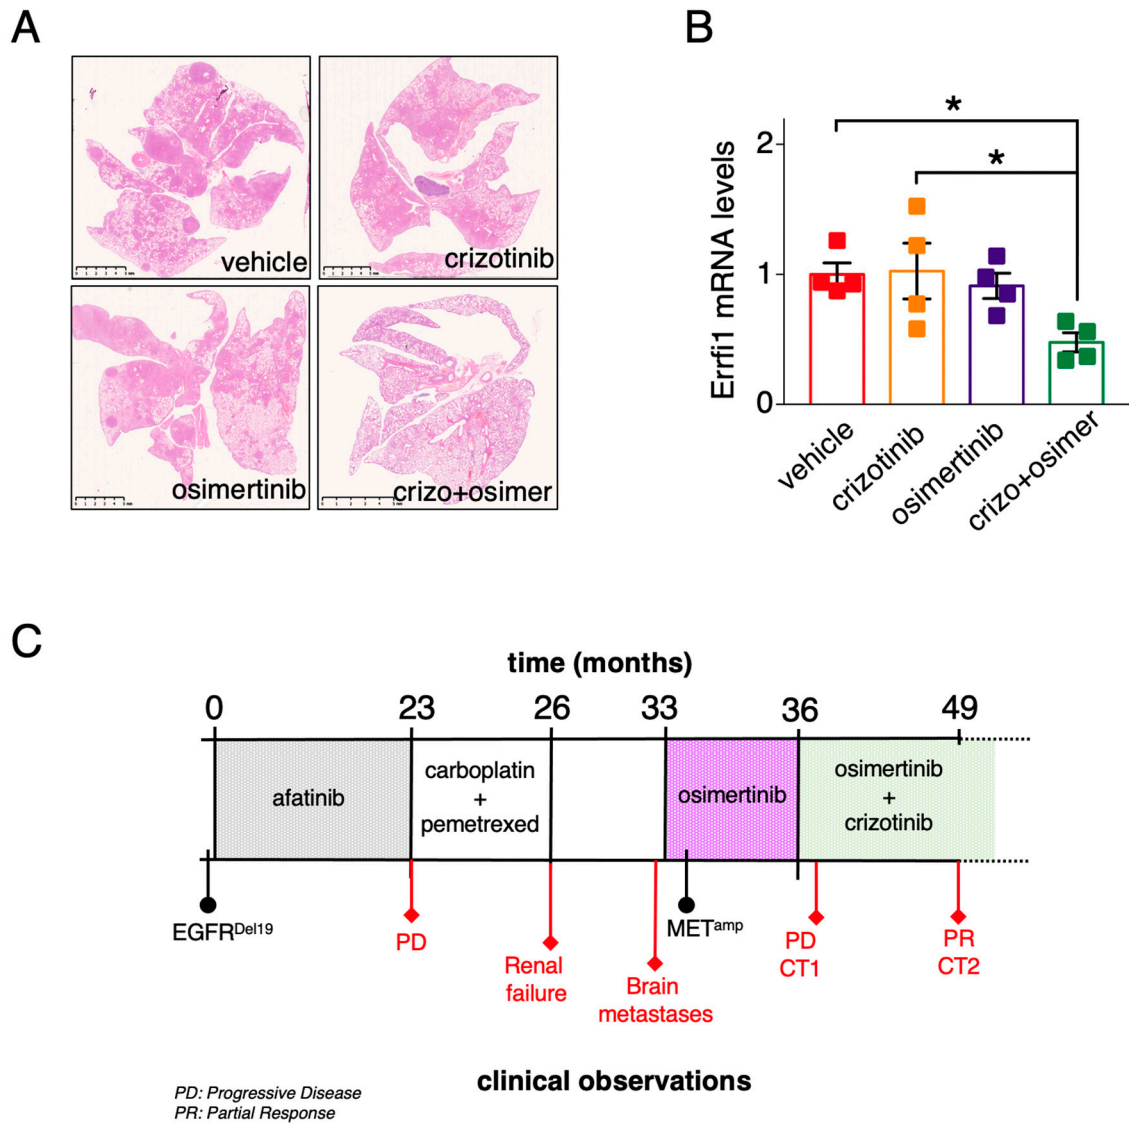

**Figure S4.** (A) Examples of hematoxylin and eosin staining of whole lungs from EGFR/MET mice treated as described in A. Scale bar, 5 mm. (B). *Errfi1* mRNA expression levels in lungs from EGFR/MET mice treated as described in A ( $n = 4$  animals per treatment group). Values are mean  $\pm$  SEM; \*  $p \leq 0.05$  (one-way ANOVA followed by the Tukey post-hoc test). (C) The cartoon depicts the clinical observation and treatments of a case report referring to Figure 4E.
